# Supplementary material
Source: PubMed Central journal article supplement (PMC4006298)
Supplement: NIHMS554719-supplement-01.pdf [file NIHMS554719-supplement-01.pdf]

**Supplemental Table 1. Selected prostate cancer risk loci and their association with prostate cancer risk in BPC3**

| SNP                        | Gene    | Location       | Chr       | Position  | Risk allele | Reference allele | allele frequency | allele frequency (cases) | BPC3 OR         | BPC3 p-value |
|----------------------------|---------|----------------|-----------|-----------|-------------|------------------|------------------|--------------------------|-----------------|--------------|
| rs13385191                 | C2orf43 | intronic       | 2         | 20751746  | G           | A                | 0.24             | 0.26                     | 1.07(1.01-1.12) | 0.01         |
| rs1465618                  | THADA   | intronic       | 2         | 43407453  | T           | C                | 0.21             | 0.23                     | 1.11(1.05-1.16) | <.0001       |
| rs721048                   | EHBP1   | intronic       | 2         | 62985235  | A           | G                | 0.18             | 0.19                     | 1.12(1.06-1.18) | <.0001       |
| rs10187424                 | ---     | intergenic     | 2         | 85647808  | A           | G                | 0.58             | 0.58                     | 1.02(0.96-1.07) | 0.53         |
| rs12621278                 | ITGA6   | intronic       | 2         | 173019799 | A           | G                | 0.94             | 0.95                     | 1.17(1.07-1.28) | 0.0008       |
| rs2292884                  | MLPH    | non-synonymous | 2         | 238107965 | G           | A                | 0.25             | 0.25                     | 1.04(0.98-1.09) | 0.17         |
| rs2660753                  | ---     | intergenic     | 3         | 87193364  | T           | C                | 0.11             | 0.12                     | 1.12(1.06-1.19) | 0.0002       |
| rs7629490                  | ---     | intergenic     | 3         | 87324187  | T           | C                | 0.34             | 0.36                     | 1.10(1.05-1.15) | <.0001       |
| rs6763931                  | ---     | intergenic     | 3         | 142585523 | T           | C                | 0.44             | 0.44                     | 1.04(0.98-1.09) | 0.20         |
| rs10936632                 | ---     | intergenic     | 3         | 171612796 | A           | C                | 0.49             | 0.52                     | 1.11(1.06-1.17) | <.0001       |
| rs17021918                 | PDLIM5  | intronic       | 4         | 95781900  | C           | T                | 0.66             | 0.68                     | 1.08(1.04-1.13) | 0.0003       |
| rs7679673                  | ---     | intergenic     | 4         | 106280983 | C           | A                | 0.58             | 0.61                     | 1.15(1.10-1.19) | <.0001       |
| rs2242652                  | TERT    | intronic       | 5         | 1333028   | G           | A                | 0.80             | 0.82                     | 1.16(1.08-1.24) | <.0001       |
| rs12653946                 | ---     | intergenic     | 5         | 1948829   | T           | C                | 0.42             | 0.45                     | 1.10(1.05-1.15) | <.0001       |
| rs2121875                  | FGF10   | intronic       | 5         | 44401302  | G           | T                | 0.33             | 0.34                     | 1.04(0.98-1.10) | 0.15         |
| rs130067                   | CCHCR1  | non-synonymous | 6         | 31226490  | G           | T                | 0.20             | 0.20                     | 1.01(0.95-1.08) | 0.67         |
| rs1983891 (or rs9381080)   | FOXP4   | intronic       | 6         | 41644405  | T           | C                | 0.28             | 0.30                     | 1.09(1.04-1.14) | 0.0003       |
| rs339331                   | RFXDC1  | intronic       | 6         | 117316745 | T           | C                | 0.71             | 0.72                     | 1.08(1.03-1.13) | 0.002        |
| rs9364554                  | SLC22A3 | intronic       | 6         | 160753654 | T           | C                | 0.28             | 0.29                     | 1.08(1.03-1.12) | 0.001        |
| rs12155172                 | ---     | intergenic     | 7         | 20961016  | A           | G                | 0.22             | 0.23                     | 1.09(1.04-1.14) | 0.0006       |
| rs10486567                 | JAZF1   | intronic       | 7         | 27943088  | G           | A                | 0.76             | 0.79                     | 1.20(1.15-1.26) | <.0001       |
| rs6465657                  | LMTK2   | intronic       | 7         | 97654263  | C           | T                | 0.46             | 0.48                     | 1.10(1.06-1.14) | <.0001       |
| rs2928679 (or rs13264338)  | ---     | intergenic     | 8         | 23494920  | A           | G                | 0.44             | 0.46                     | 1.06(1.02-1.11) | 0.003        |
| rs1512268                  | ---     | intergenic     | 8         | 23582408  | T           | C                | 0.44             | 0.46                     | 1.11(1.06-1.15) | <.0001       |
| rs1016343                  | ---     | intergenic     | 8         | 128162479 | T           | C                | 0.20             | 0.24                     | 1.25(1.19-1.31) | <.0001       |
| rs16901979                 | ---     | intergenic     | 8         | 128194098 | A           | C                | 0.03             | 0.05                     | 1.41(1.27-1.57) | <.0001       |
| rs16902094                 | ---     | intergenic     | 8         | 128389528 | G           | A                | 0.16             | 0.18                     | 1.17(1.11-1.24) | <.0001       |
| rs620861                   | ---     | intergenic     | 8         | 128404855 | C           | T                | 0.63             | 0.66                     | 1.16(1.11-1.21) | <.0001       |
| rs6983267                  | ---     | intergenic     | 8         | 128482487 | G           | T                | 0.51             | 0.56                     | 1.23(1.19-1.28) | <.0001       |
| rs4242382                  | ---     | intergenic     | 8         | 128586755 | A           | G                | 0.10             | 0.14                     | 1.39(1.31-1.48) | <.0001       |
| rs1571801                  | DAB2IP  | intronic       | 9         | 123467194 | A           | C                | 0.25             | 0.27                     | 1.07(1.03-1.12) | 0.002        |
| rs10993994                 | MSMB    | upstream       | 10        | 51219502  | T           | C                | 0.39             | 0.44                     | 1.23(1.18-1.28) | <.0001       |
| rs7127900                  | ---     | intergenic     | 11        | 2190150   | A           | G                | 0.20             | 0.22                     | 1.14(1.08-1.20) | <.0001       |
| rs12418451 (or rs10896438) | ---     | intergenic     | 11        | 68691995  | A           | G                | 0.30             | 0.32                     | 1.12(1.08-1.17) | <.0001       |
| rs10896449                 | ---     | intergenic     | 11        | 68751243  | G           | A                | 0.50             | 0.55                     | 1.19(1.15-1.24) | <.0001       |
| rs10875943                 | ---     | intergenic     | 12        | 47962277  | C           | T                | 0.30             | 0.32                     | 1.06(1.00-1.12) | 0.04         |
| rs902774                   | ---     | intergenic     | 12        | 51560171  | A           | G                | 0.15             | 0.16                     | 1.12(1.06-1.19) | 0.0001       |
| rs11649743                 | HNF1B   | intronic       | 17        | 33149092  | G           | A                | 0.81             | 0.83                     | 1.15(1.10-1.21) | <.0001       |
| rs4430796                  | HNF1B   | intronic       | 17        | 33172153  | A           | G                | 0.51             | 0.56                     | 1.25(1.20-1.30) | <.0001       |
| rs1859962                  | N/A     | intergenic     | 17        | 66620348  | G           | T                | 0.48             | 0.53                     | 1.19(1.15-1.24) | <.0001       |
| rs8102476                  | N/A     | intergenic     | 19        | 43427453  | C           | T                | 0.55             | 0.56                     | 1.08(1.03-1.12) | 0.0003       |
| rs11672691 (or rs11673591) | N/A     | intergenic     | 19        | 46677771  | G           | A                | 0.74             | 0.76                     | 1.12(1.06-1.17) | <.0001       |
| rs2735839                  | KLK3    | downstream     | 19        | 56056435  | G           | A                | 0.85             | 0.87                     | 1.16(1.10-1.23) | <.0001       |
| rs5759167                  | ---     | intergenic     | 22        | 41830156  | G           | T                | 0.50             | 0.54                     | 1.15(1.11-1.20) | <.0001       |
| rs11704416                 | TNRC6B  | upstream       | 22        | 38766919  | G           | C                | 0.19             | 0.21                     | 1.09(1.03-1.15) | 0.004        |
| rs5945619                  | NUDT11  | downstream     | X (hg_17) | 51074708  | C           | T                | 0.35             | 0.40                     | 1.11(1.08-1.15) | <.0001       |
| rs5919432                  | ---     | intergenic     | X (hg_17) | 66804571  | A           | G                | 0.79             | 0.81                     | 1.06(1.01-1.11) | 0.01         |

\*the risk allele is defined as the allele associated with an increased risk of prostate cancer incidence from the literature

---

**Supplemental Table 2. Minor allele frequencies (MAF) of original and imputed data**

| SNP        | MAF (nonimputed) | MAF(imputed) |
|------------|------------------|--------------|
| rs13385191 | 0.26             | 0.25         |
| rs1465618  | 0.23             | 0.23         |
| rs721048   | 0.19             | 0.19         |
| rs10187424 | 0.42             | 0.42         |
| rs12621278 | 0.05             | 0.05         |
| rs2292884  | 0.25             | 0.26         |
| rs2660753  | 0.12             | 0.12         |
| rs7629490  | 0.36             | 0.36         |
| rs6763931  | 0.44             | 0.44         |
| rs10936632 | 0.48             | 0.48         |
| rs17021918 | 0.32             | 0.33         |
| rs7679673  | 0.39             | 0.39         |
| rs2242652  | 0.18             | 0.18         |
| rs12653946 | 0.45             | 0.45         |
| rs2121875  | 0.34             | 0.34         |
| rs130067   | 0.20             | 0.20         |
| rs1983891  | 0.30             | 0.30         |
| rs339331   | 0.28             | 0.27         |
| rs9364554  | 0.29             | 0.29         |
| rs12155172 | 0.23             | 0.24         |
| rs10486567 | 0.21             | 0.21         |
| rs6465657  | 0.48             | 0.48         |
| rs2928679  | 0.46             | 0.45         |
| rs1512268  | 0.46             | 0.47         |
| rs1016343  | 0.24             | 0.24         |
| rs16901979 | 0.05             | 0.05         |
| rs16902094 | 0.18             | 0.18         |
| rs620861   | 0.34             | 0.34         |
| rs6983267  | 0.44             | 0.44         |
| rs4242382  | 0.14             | 0.13         |
| rs1571801  | 0.27             | 0.26         |
| rs10993994 | 0.44             | 0.43         |
| rs7127900  | 0.22             | 0.22         |
| rs12418451 | 0.32             | 0.32         |
| rs10896449 | 0.45             | 0.45         |
| rs10875943 | 0.32             | 0.31         |
| rs902774   | 0.16             | 0.17         |
| rs11649743 | 0.17             | 0.17         |
| rs4430796  | 0.44             | 0.44         |
| rs1859962  | 0.47             | 0.47         |
| rs8102476  | 0.44             | 0.44         |
| rs11672691 | 0.24             | 0.24         |
| rs2735839  | 0.13             | 0.13         |
| rs5759167  | 0.47             | 0.46         |
| rs11704416 | 0.21             | 0.20         |
| rs5945619  | 0.40             | 0.40         |
| rs5919432  | 0.19             | 0.16         |

---

**Supplemental Table 3. Per-allele hazard ratio (HR) for each SNP and the multi-marker kernel test for associations with time to prostate cancer death**

| SNP        | Gene    | Location       | Chr       | Risk allele | Reference allele | Model 1: adjusted for age and cohort |              | Model 2: Model 1 + Gleason grade and clinical stage |         |
|------------|---------|----------------|-----------|-------------|------------------|--------------------------------------|--------------|-----------------------------------------------------|---------|
|            |         |                |           |             |                  | HR (95% CI)                          | P-value      | HR (95% CI)                                         | P-value |
| rs13385191 | C2orf43 | intronic       | 2         | G           | A                | 0.88(0.78-1.00)                      | <b>0.05</b>  | 0.94(0.84-1.06)                                     | 0.33    |
| rs1465618  | THADA   | intronic       | 2         | T           | C                | 0.99(0.89-1.10)                      | 0.84         | 0.98(0.88-1.09)                                     | 0.73    |
| rs721048   | EHBP1   | intronic       | 2         | A           | G                | 0.96(0.85-1.07)                      | 0.44         | 1.01(0.91-1.14)                                     | 0.80    |
| rs10187424 | ---     | intergenic     | 2         | A           | G                | 1.04(0.93-1.17)                      | 0.48         | 1.07(0.95-1.20)                                     | 0.28    |
| rs12621278 | ITGA6   | intronic       | 2         | A           | G                | 0.93(0.75-1.15)                      | 0.52         | 0.86(0.69-1.06)                                     | 0.16    |
| rs2292884  | MLPH    | non-synonymous | 2         | G           | A                | 1.03(0.91-1.16)                      | 0.64         | 1.02(0.90-1.15)                                     | 0.75    |
| rs2660753  | ---     | intergenic     | 3         | T           | C                | 1.05(0.92-1.20)                      | 0.46         | 1.02(0.89-1.16)                                     | 0.81    |
| rs7629490  | ---     | intergenic     | 3         | T           | C                | 0.93(0.84-1.04)                      | 0.21         | 0.93(0.83-1.04)                                     | 0.20    |
| rs6763931  | ---     | intergenic     | 3         | T           | C                | 1.02(0.92-1.15)                      | 0.68         | 1.02(0.91-1.14)                                     | 0.77    |
| rs10936632 | ---     | intergenic     | 3         | A           | C                | 1.12(0.99-1.26)                      | 0.07         | 1.11(0.98-1.25)                                     | 0.10    |
| rs17021918 | PDLIM5  | intronic       | 4         | C           | T                | 0.89(0.81-0.97)                      | <b>0.01</b>  | 0.91(0.82-1.00)                                     | 0.04    |
| rs7679673  | ---     | intergenic     | 4         | C           | A                | 1.04(0.95-1.14)                      | 0.40         | 1.03(0.94-1.13)                                     | 0.49    |
| rs2242652  | TERT    | intronic       | 5         | G           | A                | 1.03(0.90-1.19)                      | 0.64         | 0.95(0.82-1.10)                                     | 0.49    |
| rs12653946 | ---     | intergenic     | 5         | T           | C                | 1.03(0.93-1.15)                      | 0.52         | 1.00(0.90-1.11)                                     | 0.98    |
| rs2121875  | FGF10   | intronic       | 5         | G           | T                | 0.98(0.87-1.11)                      | 0.77         | 0.99(0.88-1.11)                                     | 0.83    |
| rs130067   | CCHCR1  | non-synonymous | 6         | G           | T                | 0.95(0.83-1.09)                      | 0.46         | 0.97(0.84-1.11)                                     | 0.63    |
| rs1983891  | FOXP4   | intronic       | 6         | T           | C                | 0.96(0.86-1.07)                      | 0.46         | 0.95(0.85-1.07)                                     | 0.41    |
| rs339331   | RFXDC1  | intronic       | 6         | T           | C                | 0.99(0.88-1.10)                      | 0.80         | 0.96(0.86-1.07)                                     | 0.46    |
| rs9364554  | SLC22A3 | intronic       | 6         | T           | C                | 0.99(0.90-1.09)                      | 0.78         | 1.01(0.91-1.11)                                     | 0.89    |
| rs12155172 | ---     | intergenic     | 7         | A           | G                | 1.02(0.91-1.14)                      | 0.69         | 1.08(0.96-1.21)                                     | 0.18    |
| rs10486567 | JAZF1   | intronic       | 7         | G           | A                | 0.85(0.76-0.94)                      | <b>0.001</b> | 0.87(0.79-0.97)                                     | 0.008   |
| rs6465657  | LMTK2   | intronic       | 7         | C           | T                | 0.90(0.82-0.98)                      | <b>0.02</b>  | 0.92(0.85-1.01)                                     | 0.08    |
| rs2928679  | ---     | intergenic     | 8         | A           | G                | 1.01(0.92-1.10)                      | 0.87         | 1.03(0.94-1.12)                                     | 0.56    |
| rs1512268  | ---     | intergenic     | 8         | T           | C                | 0.93(0.85-1.02)                      | 0.12         | 0.96(0.88-1.05)                                     | 0.39    |
| rs1016343  | ---     | intergenic     | 8         | T           | C                | 1.08(0.98-1.20)                      | 0.13         | 1.09(0.99-1.21)                                     | 0.09    |
| rs16901979 | ---     | intergenic     | 8         | A           | C                | 1.03(0.84-1.27)                      | 0.78         | 1.06(0.87-1.29)                                     | 0.58    |
| rs16902094 | ---     | intergenic     | 8         | G           | A                | 1.04(0.92-1.17)                      | 0.56         | 1.05(0.93-1.18)                                     | 0.45    |
| rs620861   | ---     | intergenic     | 8         | C           | T                | 0.97(0.88-1.07)                      | 0.49         | 0.96(0.87-1.06)                                     | 0.45    |
| rs6983267  | ---     | intergenic     | 8         | G           | T                | 1.00(0.92-1.09)                      | 0.99         | 1.02(0.94-1.12)                                     | 0.62    |
| rs4242382  | ---     | intergenic     | 8         | A           | G                | 1.00(0.89-1.13)                      | 0.94         | 0.98(0.87-1.11)                                     | 0.77    |
| rs1571801  | DAB2IP  | intronic       | 9         | A           | C                | 1.09(0.99-1.20)                      | 0.08         | 1.10(1.00-1.21)                                     | 0.06    |
| rs10993994 | MSMB    | upstream       | 10        | T           | C                | 0.90(0.83-0.98)                      | <b>0.02</b>  | 0.87(0.80-0.95)                                     | 0.002   |
| rs7127900  | ---     | intergenic     | 11        | A           | G                | 0.86(0.77-0.97)                      | <b>0.01</b>  | 0.87(0.78-0.97)                                     | 0.02    |
| rs12418451 | ---     | intergenic     | 11        | A           | G                | 1.00(0.91-1.10)                      | 0.96         | 1.02(0.93-1.12)                                     | 0.69    |
| rs10896449 | ---     | intergenic     | 11        | G           | A                | 0.92(0.85-1.01)                      | 0.08         | 0.92(0.85-1.01)                                     | 0.07    |
| rs10875943 | ---     | intergenic     | 12        | C           | T                | 0.97(0.86-1.09)                      | 0.59         | 0.98(0.87-1.10)                                     | 0.72    |
| rs902774   | ---     | intergenic     | 12        | A           | G                | 1.11(0.98-1.25)                      | 0.10         | 1.10(0.98-1.25)                                     | 0.12    |
| rs11649743 | HNF1B   | intronic       | 17        | G           | A                | 0.99(0.88-1.11)                      | 0.80         | 0.97(0.86-1.09)                                     | 0.59    |
| rs4430796  | HNF1B   | intronic       | 17        | A           | G                | 1.02(0.93-1.11)                      | 0.70         | 1.05(0.96-1.15)                                     | 0.31    |
| rs1859962  | N/A     | intergenic     | 17        | G           | T                | 1.03(0.94-1.12)                      | 0.56         | 1.05(0.96-1.15)                                     | 0.28    |
| rs8102476  | N/A     | intergenic     | 19        | C           | T                | 1.03(0.94-1.13)                      | 0.54         | 1.03(0.94-1.13)                                     | 0.47    |
| rs11672691 | N/A     | intergenic     | 19        | G           | A                | 1.18(1.05-1.34)                      | <b>0.007</b> | 1.16(1.02-1.31)                                     | 0.02    |
| rs2735839  | KLK3    | downstream     | 19        | G           | A                | 0.82(0.73-0.93)                      | <b>0.002</b> | 0.85(0.75-0.96)                                     | 0.01    |
| rs5759167  | ---     | intergenic     | 22        | G           | T                | 0.99(0.91-1.08)                      | 0.85         | 0.97(0.89-1.06)                                     | 0.54    |
| rs11704416 | TNRC6B  | upstream       | 22        | G           | C                | 1.10(0.98-1.25)                      | 0.11         | 1.05(0.93-1.18)                                     | 0.47    |
| rs5945619  | NUDT11  | downstream     | X (hg_17) | C           | T                | 1.01(0.95-1.08)                      | 0.74         | 1.02(0.96-1.09)                                     | 0.55    |
| rs5919432  | ---     | intergenic     | X (hg_17) | A           | G                | 1.00(0.90-1.10)                      | 0.95         | 0.99(0.90-1.09)                                     | 0.84    |
|            |         |                |           |             |                  | kernel machine p-value               | <b>0.05</b>  | kernel machine p-value                              | 0.08    |

**Supplemental Table 4. Per-risk allele odds ratios for fatal vs. non-fatal prostate cancer**

| SNP        | Gene    | Location       | Chr       | Risk allele | Reference allele | OR (95% CI)     | p-value |
|------------|---------|----------------|-----------|-------------|------------------|-----------------|---------|
| rs13385191 | C2orf43 | intronic       | 2         | G           | A                | 0.89(0.78-1.01) | 0.08    |
| rs1465618  | THADA   | intronic       | 2         | T           | C                | 0.99(0.88-1.11) | 0.83    |
| rs721048   | EHBP1   | intronic       | 2         | A           | G                | 0.94(0.84-1.07) | 0.36    |
| rs10187424 | ---     | intergenic     | 2         | A           | G                | 1.04(0.92-1.18) | 0.55    |
| rs12621278 | ITGA6   | intronic       | 2         | A           | G                | 0.95(0.76-1.19) | 0.66    |
| rs2292884  | MLPH    | non-synonymous | 2         | G           | A                | 1.03(0.91-1.18) | 0.63    |
| rs2660753  | ---     | intergenic     | 3         | T           | C                | 1.04(0.90-1.20) | 0.59    |
| rs7629490  | ---     | intergenic     | 3         | T           | C                | 0.94(0.83-1.05) | 0.28    |
| rs6763931  | ---     | intergenic     | 3         | T           | C                | 1.03(0.91-1.16) | 0.62    |
| rs10936632 | ---     | intergenic     | 3         | A           | C                | 1.13(0.99-1.28) | 0.06    |
| rs17021918 | PDLIM5  | intronic       | 4         | C           | T                | 0.89(0.80-0.98) | 0.02    |
| rs7679673  | ---     | intergenic     | 4         | C           | A                | 1.05(0.95-1.16) | 0.36    |
| rs2242652  | TERT    | intronic       | 5         | G           | A                | 1.03(0.88-1.20) | 0.75    |
| rs12653946 | ---     | intergenic     | 5         | T           | C                | 1.06(0.95-1.19) | 0.28    |
| rs2121875  | FGF10   | intronic       | 5         | G           | T                | 0.96(0.84-1.09) | 0.52    |
| rs130067   | CCHCR1  | non-synonymous | 6         | G           | T                | 0.97(0.83-1.13) | 0.71    |
| rs1983891  | FOXP4   | intronic       | 6         | T           | C                | 0.94(0.83-1.06) | 0.33    |
| rs339331   | RFXDC1  | intronic       | 6         | T           | C                | 0.97(0.86-1.09) | 0.61    |
| rs9364554  | SLC22A3 | intronic       | 6         | T           | C                | 0.99(0.90-1.10) | 0.90    |
| rs12155172 | ---     | intergenic     | 7         | A           | G                | 1.00(0.89-1.13) | 0.99    |
| rs10486567 | JAZF1   | intronic       | 7         | G           | A                | 0.86(0.77-0.96) | 0.006   |
| rs6465657  | LMTK2   | intronic       | 7         | C           | T                | 0.88(0.80-0.97) | 0.008   |
| rs2928679  | ---     | intergenic     | 8         | A           | G                | 1.01(0.91-1.11) | 0.89    |
| rs1512268  | ---     | intergenic     | 8         | T           | C                | 0.93(0.84-1.02) | 0.13    |
| rs1016343  | ---     | intergenic     | 8         | T           | C                | 1.09(0.97-1.22) | 0.15    |
| rs16901979 | ---     | intergenic     | 8         | A           | C                | 1.07(0.86-1.35) | 0.53    |
| rs16902094 | ---     | intergenic     | 8         | G           | A                | 1.08(0.95-1.23) | 0.25    |
| rs620861   | ---     | intergenic     | 8         | C           | T                | 0.96(0.86-1.07) | 0.47    |
| rs6983267  | ---     | intergenic     | 8         | G           | T                | 0.99(0.90-1.09) | 0.90    |
| rs4242382  | ---     | intergenic     | 8         | A           | G                | 1.01(0.89-1.16) | 0.86    |
| rs1571801  | DAB2IP  | intronic       | 9         | A           | C                | 1.10(0.99-1.23) | 0.06    |
| rs10993994 | MSMB    | upstream       | 10        | T           | C                | 0.89(0.81-0.98) | 0.02    |
| rs7127900  | ---     | intergenic     | 11        | A           | G                | 0.86(0.76-0.97) | 0.01    |
| rs12418451 | ---     | intergenic     | 11        | A           | G                | 1.00(0.90-1.11) | 0.98    |
| rs10896449 | ---     | intergenic     | 11        | G           | A                | 0.92(0.84-1.01) | 0.09    |
| rs10875943 | ---     | intergenic     | 12        | C           | T                | 0.96(0.85-1.09) | 0.56    |
| rs902774   | ---     | intergenic     | 12        | A           | G                | 1.11(0.97-1.26) | 0.14    |
| rs11649743 | HNF1B   | intronic       | 17        | G           | A                | 0.98(0.87-1.11) | 0.77    |
| rs4430796  | HNF1B   | intronic       | 17        | A           | G                | 1.02(0.92-1.12) | 0.72    |
| rs1859962  | N/A     | intergenic     | 17        | G           | T                | 1.03(0.93-1.13) | 0.60    |
| rs8102476  | N/A     | intergenic     | 19        | C           | T                | 1.04(0.94-1.14) | 0.48    |
| rs11672691 | N/A     | intergenic     | 19        | G           | A                | 1.17(1.02-1.33) | 0.02    |
| rs2735839  | KLK3    | downstream     | 19        | G           | A                | 0.81(0.71-0.92) | 0.002   |
| rs5759167  | ---     | intergenic     | 22        | G           | T                | 1.00(0.91-1.10) | 0.96    |
| rs11704416 | TNRC6B  | upstream       | 22        | G           | C                | 1.13(0.99-1.29) | 0.07    |
| rs5945619  | NUDT11  | downstream     | X (hg_17) | C           | T                | 1.00(0.93-1.07) | 0.97    |
| rs5919432  | ---     | intergenic     | X (hg_17) | A           | G                | 0.98(0.88-1.10) | 0.75    |

**Supplemental Table 5. Per-risk allele odds ratio (OR) for each risk SNP and fatal prostate cancer vs. controls and non-fatal prostate cancer vs controls\***

| SNP        | Gene    | Location       | Chr | Risk allele | Reference allele | Fatal     |                     |              | Fatal           |         | Non-Fatal       |         |              |
|------------|---------|----------------|-----|-------------|------------------|-----------|---------------------|--------------|-----------------|---------|-----------------|---------|--------------|
|            |         |                |     |             |                  | cases (n) | Non-fatal cases (n) | Controls (n) | OR (95% CI)     | p-value | OR (95% CI)     | p-value | p-contrast   |
| rs13385191 | C2orf43 | intronic       | 2   | G           | A                | 722       | 7079                | 8201         | 0.95(0.84-1.08) | 0.47    | 1.08(1.02-1.14) | 0.004   | 0.06         |
| rs1465618  | THADA   | intronic       | 2   | T           | C                | 937       | 8808                | 9811         | 1.08(0.97-1.22) | 0.17    | 1.11(1.06-1.17) | <.0001  | 0.69         |
| rs721048   | EHBP1   | intronic       | 2   | A           | G                | 1011      | 9135                | 10655        | 1.06(0.93-1.19) | 0.38    | 1.12(1.07-1.18) | <.0001  | 0.31         |
| rs10187424 | ---     | intergenic     | 2   | A           | G                | 592       | 4833                | 5429         | 1.06(0.94-1.20) | 0.35    | 1.01(0.96-1.07) | 0.66    | 0.47         |
| rs12621278 | ITGA6   | intronic       | 2   | A           | G                | 958       | 8851                | 9851         | 1.12(0.90-1.40) | 0.31    | 1.17(1.07-1.29) | 0.0008  | 0.71         |
| rs2292884  | MLPH    | non-synonymous | 2   | G           | A                | 711       | 6759                | 7615         | 1.06(0.94-1.21) | 0.35    | 1.03(0.98-1.09) | 0.21    | 0.68         |
| rs2660753  | ---     | intergenic     | 3   | T           | C                | 1007      | 8979                | 10682        | 1.15(1.00-1.33) | 0.05    | 1.12(1.05-1.19) | 0.0003  | 0.69         |
| rs7629490  | ---     | intergenic     | 3   | T           | C                | 720       | 6897                | 7836         | 1.03(0.92-1.15) | 0.63    | 1.11(1.05-1.16) | <.0001  | 0.22         |
| rs6763931  | ---     | intergenic     | 3   | T           | C                | 622       | 4968                | 5591         | 1.06(0.94-1.20) | 0.31    | 1.03(0.98-1.09) | 0.26    | 0.62         |
| rs10936632 | ---     | intergenic     | 3   | A           | C                | 557       | 4777                | 5430         | 1.24(1.09-1.40) | 0.0009  | 1.10(1.04-1.16) | 0.0007  | 0.07         |
| rs17021918 | PDLIM5  | intronic       | 4   | C           | T                | 952       | 8827                | 9885         | 0.97(0.88-1.07) | 0.55    | 1.09(1.05-1.14) | <.0001  | <b>0.02</b>  |
| rs7679673  | ---     | intergenic     | 4   | C           | A                | 9800      | 8808                | 9800         | 1.20(1.08-1.32) | 0.0004  | 1.14(1.09-1.19) | <.0001  | 0.34         |
| rs2242652  | TERT    | intronic       | 5   | G           | A                | 624       | 4987                | 5615         | 1.16(0.99-1.35) | 0.06    | 1.16(1.08-1.24) | <.0001  | 1.00         |
| rs12653946 | ---     | intergenic     | 5   | T           | C                | 723       | 7047                | 8157         | 1.15(1.03-1.29) | 0.01    | 1.10(1.05-1.15) | <.0001  | 0.38         |
| rs2121875  | FGF10   | intronic       | 5   | G           | T                | 605       | 4932                | 5336         | 1.01(0.89-1.15) | 0.82    | 1.05(0.99-1.11) | 0.13    | 0.65         |
| rs130067   | CCHCR1  | non-synonymous | 6   | G           | T                | 625       | 4979                | 5577         | 0.98(0.85-1.14) | 0.80    | 1.02(0.95-1.09) | 0.60    | 0.62         |
| rs1983891  | FOXP4   | intronic       | 6   | T           | C                | 733       | 7098                | 8216         | 1.02(0.91-1.15) | 0.69    | 1.10(1.05-1.15) | 0.0002  | 0.25         |
| rs339331   | RFXDC1  | intronic       | 6   | T           | C                | 728       | 7089                | 8214         | 1.05(0.94-1.19) | 0.39    | 1.08(1.03-1.14) | 0.002   | 0.66         |
| rs9364554  | SLC22A3 | intronic       | 6   | T           | C                | 1012      | 8968                | 10644        | 1.07(0.97-1.19) | 0.19    | 1.08(1.03-1.12) | 0.001   | 0.93         |
| rs12155172 | ---     | intergenic     | 7   | A           | G                | 876       | 8361                | 9788         | 1.08(0.96-1.21) | 0.21    | 1.09(1.04-1.15) | 0.0007  | 0.84         |
| rs10486567 | JAZF1   | intronic       | 7   | G           | A                | 1032      | 9196                | 10744        | 1.04(0.94-1.16) | 0.46    | 1.22(1.16-1.28) | <.0001  | <b>0.004</b> |
| rs6465657  | LMTK2   | intronic       | 7   | C           | T                | 1001      | 8979                | 10643        | 0.98(0.90-1.08) | 0.73    | 1.11(1.07-1.16) | <.0001  | <b>0.009</b> |
| rs2928679  | ---     | intergenic     | 8   | A           | G                | 967       | 8865                | 9881         | 1.07(0.97-1.17) | 0.19    | 1.06(1.02-1.11) | 0.004   | 0.97         |
| rs1512268  | ---     | intergenic     | 8   | T           | C                | 970       | 8866                | 9917         | 1.05(0.95-1.15) | 0.33    | 1.11(1.07-1.16) | <.0001  | 0.21         |
| rs1016343  | ---     | intergenic     | 8   | T           | C                | 942       | 8680                | 10296        | 1.34(1.20-1.49) | <.0001  | 1.24(1.18-1.30) | <.0001  | 0.19         |
| rs16901979 | ---     | intergenic     | 8   | A           | C                | 937       | 8169                | 9256         | 1.49(1.19-1.87) | 0.0006  | 1.40(1.26-1.56) | <.0001  | 0.59         |
| rs16902094 | ---     | intergenic     | 8   | G           | A                | 853       | 7542                | 8563         | 1.28(1.13-1.45) | 0.0002  | 1.16(1.09-1.23) | <.0001  | 0.13         |
| rs620861   | ---     | intergenic     | 8   | C           | T                | 890       | 8193                | 9785         | 1.13(1.02-1.25) | 0.02    | 1.16(1.11-1.21) | <.0001  | 0.57         |
| rs6983267  | ---     | intergenic     | 8   | G           | T                | 1025      | 9147                | 10693        | 1.23(1.13-1.35) | <.0001  | 1.23(1.19-1.28) | <.0001  | 0.99         |
| rs4242382  | ---     | intergenic     | 8   | A           | G                | 1036      | 9246                | 10810        | 1.39(1.22-1.58) | <.0001  | 1.39(1.31-1.48) | <.0001  | 0.98         |
| rs1571801  | DAB2IP  | intronic       | 9   | A           | C                | 998       | 8949                | 10005        | 1.16(1.05-1.28) | 0.005   | 1.07(1.02-1.12) | 0.0077  | 0.11         |
| rs10993994 | MSMB    | upstream       | 10  | T           | C                | 1018      | 8950                | 10615        | 1.11(1.01-1.22) | 0.03    | 1.24(1.19-1.29) | <.0001  | <b>0.02</b>  |

|            |        |            |           |   |   |      |      |       |                 |        |                 |        |              |
|------------|--------|------------|-----------|---|---|------|------|-------|-----------------|--------|-----------------|--------|--------------|
| rs7127900  | ---    | intergenic | 11        | A | G | 959  | 8821 | 9876  | 1.01(0.89-1.13) | 0.92   | 1.16(1.10-1.22) | <.0001 | <b>0.02</b>  |
| rs12418451 | ---    | intergenic | 11        | A | G | 963  | 8747 | 10382 | 1.12(1.01-1.25) | 0.02   | 1.12(1.07-1.17) | <.0001 | 0.97         |
| rs10896449 | ---    | intergenic | 11        | G | A | 1020 | 9088 | 10624 | 1.12(1.02-1.22) | 0.02   | 1.20(1.15-1.25) | <.0001 | 0.13         |
| rs10875943 | ---    | intergenic | 12        | C | T | 621  | 5003 | 5593  | 1.04(0.92-1.19) | 0.50   | 1.06(1.00-1.13) | 0.04   | 0.77         |
| rs902774   | ---    | intergenic | 12        | A | G | 851  | 7876 | 8882  | 1.22(1.07-1.39) | 0.004  | 1.11(1.05-1.18) | 0.0006 | 0.17         |
| rs11649743 | HNF1B  | intronic   | 17        | G | A | 1025 | 9145 | 10711 | 1.14(1.01-1.29) | 0.03   | 1.15(1.09-1.21) | <.0001 | 0.91         |
| rs4430796  | HNF1B  | intronic   | 17        | A | G | 1012 | 8958 | 9958  | 1.29(1.17-1.41) | <.0001 | 1.25(1.20-1.30) | <.0001 | 0.54         |
| rs1859962  | N/A    | intergenic | 17        | G | T | 1023 | 9165 | 10728 | 1.23(1.12-1.34) | <.0001 | 1.19(1.14-1.24) | <.0001 | 0.54         |
| rs8102476  | N/A    | intergenic | 19        | C | T | 942  | 8477 | 10044 | 1.10(1.00-1.21) | 0.05   | 1.07(1.03-1.12) | 0.0007 | 0.63         |
| rs11672691 | N/A    | intergenic | 19        | G | A | 722  | 7034 | 7844  | 1.26(1.11-1.43) | 0.0005 | 1.10(1.05-1.16) | 0.0003 | <b>0.05</b>  |
| rs2735839  | KLK3   | downstream | 19        | G | A | 995  | 8853 | 10543 | 0.96(0.84-1.09) | 0.50   | 1.19(1.12-1.26) | <.0001 | <b>0.001</b> |
| rs5759167  | ---    | intergenic | 22        | G | T | 963  | 8868 | 9915  | 1.16(1.05-1.27) | 0.003  | 1.15(1.10-1.20) | <.0001 | 0.92         |
| rs11704416 | TNRC6B | upstream   | 22        | G | C | 729  | 7047 | 7890  | 1.21(1.06-1.38) | 0.004  | 1.07(1.01-1.14) | 0.01   | 0.07         |
| rs5945619  | NUDT11 | downstream | X (hg_17) | C | T | 1011 | 8975 | 10630 | 1.11(1.04-1.19) | 0.002  | 1.11(1.08-1.15) | <.0001 | 0.99         |
| rs5919432  | ---    | intergenic | X (hg_17) | A | G | 621  | 4975 | 5579  | 1.05(0.94-1.17) | 0.38   | 1.06(1.01-1.11) | 0.02   | 0.83         |

\*1053 fatal cases, 9434 non-fatal cases, 11024 controls; model adjusted for age and study cohort
